# Supplementary material for: Electrochemical sensors based on the composite of reduced graphene oxide and a multiwalled carbon nanotube-modified glassy carbon electrode for simultaneous detection of hydroquinone, dopamine, and uric acid
Source: Royal Society of Chemistry journal article supplement (doi:10.1039/d4ra05537c), 2024-01-01
Supplement: d4ra05537c1.pdf [file d4ra05537c1.pdf]

## Supplementary materials

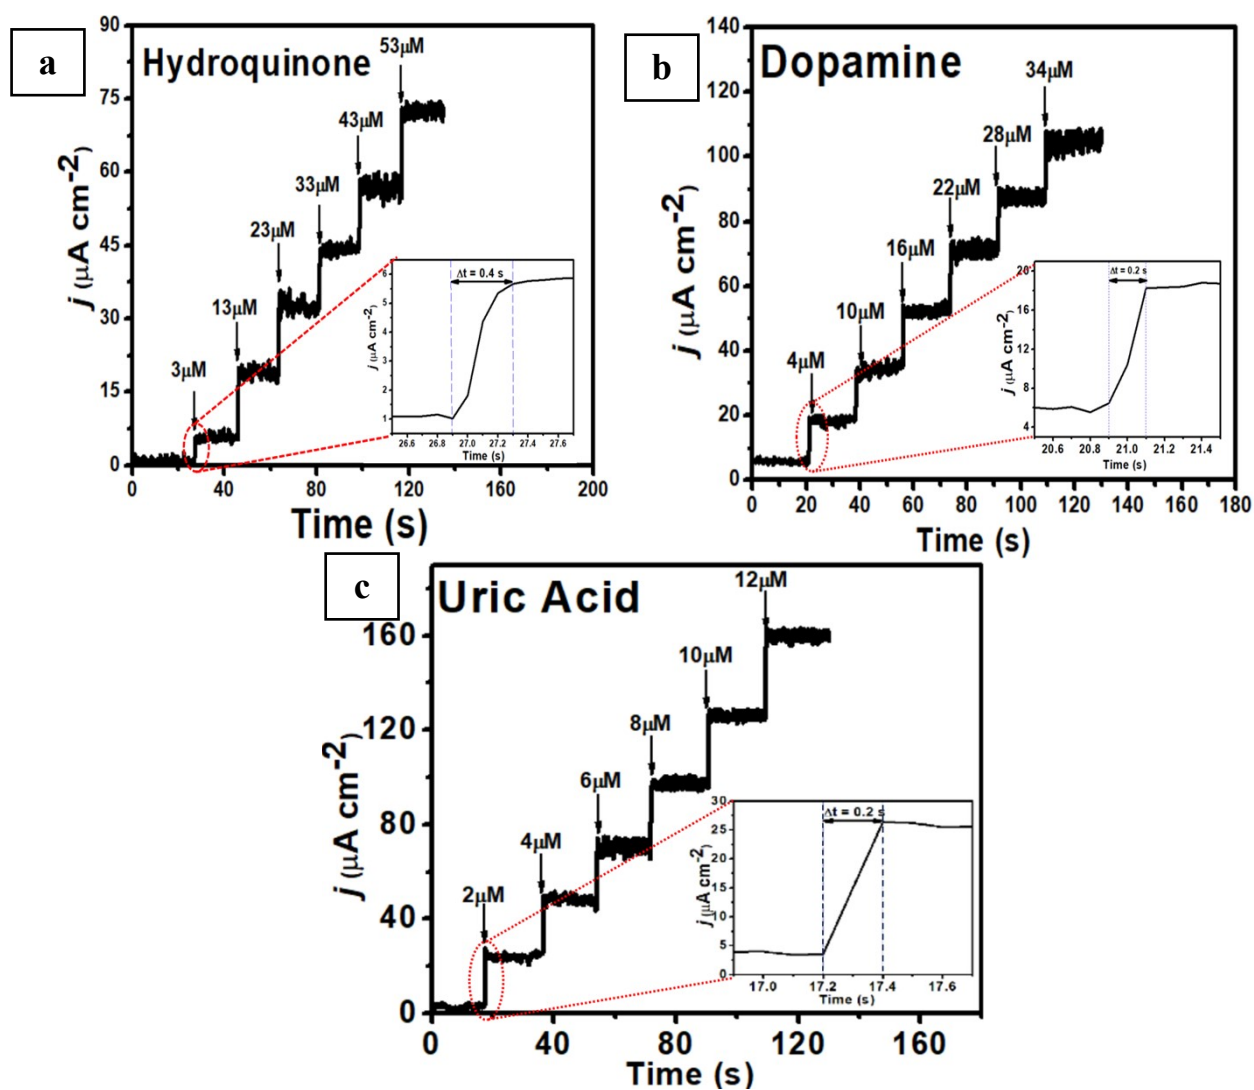

Figure S1. The response time of RGO/MWCNT (1:1)-modified GCE after the injection of (a) hydroquinone, (b) dopamine, and (c) uric acid at the optimized potential using chronoamperometric methods.

Table S1 Percentage of recovery obtained from 6 different human urine samples

| Sample  | Spiked |    |    | Found     |           |          | %Recovery |         |         |
|---------|--------|----|----|-----------|-----------|----------|-----------|---------|---------|
|         | HQ     | DA | UA | HQ        | DA        | UA       | HQ        | DA      | UA      |
| Urine 1 | 5      | 3  | 1  | 4.8±0.1   | 2.9±0.02  | 1.0±0.06 | 96±1.5    | 95±0.6  | 99±2.7  |
|         | 10     | 6  | 2  | 9.6±0.2   | 5.7±0.1   | 2.0±0.1  | 96±2.2    | 95±1.0  | 101±2.5 |
|         | 15     | 9  | 3  | 15.2±0.3  | 9.0±0.04  | 3.0±0.06 | 101±1.8   | 100±0.4 | 99±2.0  |
|         | 20     | 12 | 4  | 20.0±0.1  | 11.5±0.2  | 3.8±0.1  | 100±0.7   | 96±1.3  | 96±2.8  |
|         | 25     | 15 | 5  | 25.3±0.4  | 14.9±0.1  | 4.8±0.06 | 101±1.9   | 99±0.4  | 95±1.2  |
| Urine 2 | 5      | 3  | 1  | 5.1±0.06  | 2.9±0.1   | 1.0±0.1  | 101±1.2   | 96±2.2  | 103±1.1 |
|         | 10     | 6  | 2  | 10.4±0.04 | 5.8±0.1   | 2.0±0.2  | 104±0.5   | 96±2.0  | 100±2.6 |
|         | 15     | 9  | 3  | 15.8±0.3  | 9.1±0.2   | 2.9±0.1  | 105±1.7   | 101±2.5 | 97±2.0  |
|         | 20     | 12 | 4  | 20.8±0.1  | 11.6±0.2  | 3.8±0.02 | 104±0.7   | 97±1.5  | 95±0.7  |
|         | 25     | 15 | 5  | 26.0±0.2  | 14.9±0.4  | 4.8±0.06 | 104±0.7   | 99±2.8  | 95±1.2  |
| Urine 3 | 5      | 3  | 1  | 5.1±0.06  | 2.9±0.08  | 1.0±0.02 | 101±1.3   | 96±2.7  | 103±2.3 |
|         | 10     | 6  | 2  | 10.4±0.04 | 5.8±0.05  | 2.1±0.01 | 104±0.3   | 96±0.9  | 103±0.1 |
|         | 15     | 9  | 3  | 15.8±0.1  | 8.8±0.03  | 2.9±0.01 | 105±0.8   | 98±0.4  | 98±0.2  |
|         | 20     | 12 | 4  | 20.6±0.6  | 11.6±0.06 | 3.8±0.03 | 103±2.8   | 97±0.5  | 96±0.8  |
|         | 25     | 15 | 5  | 26.0±0.08 | 14.4±0.2  | 4.8±0.04 | 104±0.3   | 96±1.6  | 96±0.9  |
| Urine 4 | 5      | 3  | 1  | 4.9±0.2   | 3.1±0.02  | 1.0±0.05 | 98±2.5    | 102±0.7 | 98±2.7  |
|         | 10     | 6  | 2  | 10.3±0.04 | 6.1±0.04  | 2.0±0.01 | 103±0.5   | 101±0.7 | 98±0.5  |
|         | 15     | 9  | 3  | 15.5±0.2  | 9.1±0.03  | 3.0±0.03 | 103±1.6   | 101±0.4 | 99±0.9  |
|         | 20     | 12 | 4  | 20.6±0.3  | 11.5±0.1  | 3.8±0.1  | 103±1.6   | 96±0.8  | 96±2.3  |
|         | 25     | 15 | 5  | 24.8±0.4  | 14.9±0.08 | 4.8±0.1  | 99±1.6    | 99±0.5  | 95±1.9  |
| Urine 5 | 5      | 3  | 1  | 5.2±0.08  | 2.9±0.02  | 1.0±0.06 | 104±1.7   | 98±0.8  | 100±2.4 |
|         | 10     | 6  | 2  | 10.2±0.01 | 6.1±0.04  | 2.0±0.06 | 102±0.07  | 102±0.7 | 100±1.9 |
|         | 15     | 9  | 3  | 15.0±0.1  | 8.9±0.03  | 2.9±0.03 | 100±0.8   | 99±0.4  | 95±1.0  |
|         | 20     | 12 | 4  | 20.2±0.08 | 11.9±0.1  | 3.8±0.02 | 101±0.4   | 99±0.8  | 96±0.5  |
|         | 25     | 15 | 5  | 24.5±0.2  | 15.0±0.08 | 4.8±0.05 | 98±0.8    | 100±0.6 | 96±1.0  |
| Urine 6 | 5      | 3  | 1  | 5.1±0.02  | 2.9±0.04  | 1.0±0.02 | 102±0.4   | 96±1.4  | 101±1.8 |
|         | 10     | 6  | 2  | 10.2±0.02 | 5.9±0.03  | 2.0±0.03 | 102±0.2   | 98±0.5  | 98±1.7  |
|         | 15     | 9  | 3  | 15.2±0.1  | 8.9±0.1   | 2.9±0.03 | 101±0.8   | 99±1.2  | 95±1.0  |
|         | 20     | 12 | 4  | 19.6±0.07 | 11.8±0.1  | 3.8±0.02 | 98±0.3    | 98±0.8  | 96±0.7  |
|         | 25     | 15 | 5  | 24.3±0.01 | 14.7±0.1  | 4.8±0.03 | 97±0.06   | 98±0.7  | 96±0.7  |
